# Supplementary material for: Combining intrinsic (blue) and exciplex (green and orange-red) emissions of the same material (OCT) in white organic light-emitting diodes to realize high color quality with a CRI of 97
Source: Royal Society of Chemistry journal article supplement (doi:10.1039/d2tc00711h), 2022-01-01
Supplement: d2tc00711h1.pdf [file d2tc00711h1.pdf]

## Supporting information

**Combining intrinsic (blue) and forming exciplex (green and orange-red) emissions of the same material (OCT) for white organic light-emitting diodes realizing high color quality with CRI of 97**

**Guoliang Wang<sup>a</sup>, Mengna Yin<sup>a</sup>, Yanqin Miao<sup>a,b\*</sup>, Yuanyuan Guo<sup>c</sup>, Haitao Zhou<sup>d</sup>, Qiqing Lu<sup>a</sup>,  
Jinhai Huang<sup>d\*</sup>, Hua Wang<sup>a</sup>**

<sup>a</sup>*Key Laboratory of Interface Science and Engineering in Advanced Materials, Ministry of Education, Taiyuan University of Technology, Taiyuan, 030024, China*

<sup>b</sup>*Shanxi-Zheda Institute of Advanced Materials and Chemical Engineering, Taiyuan, 030024, China*

<sup>c</sup>*Key Laboratory of Advanced Transducers and Intelligent Control System, Ministry of Education, Taiyuan University of Technology, Taiyuan, 030024, China*

<sup>d</sup>*Shanghai Taoe Chemical Technology Co., Ltd, Shanghai, PR China*

**Corresponding E-mail:** miaoyanqin@tyut.edu.cn (**Yanqin Miao**); dele12@163.com (**Jinhai Huang**)

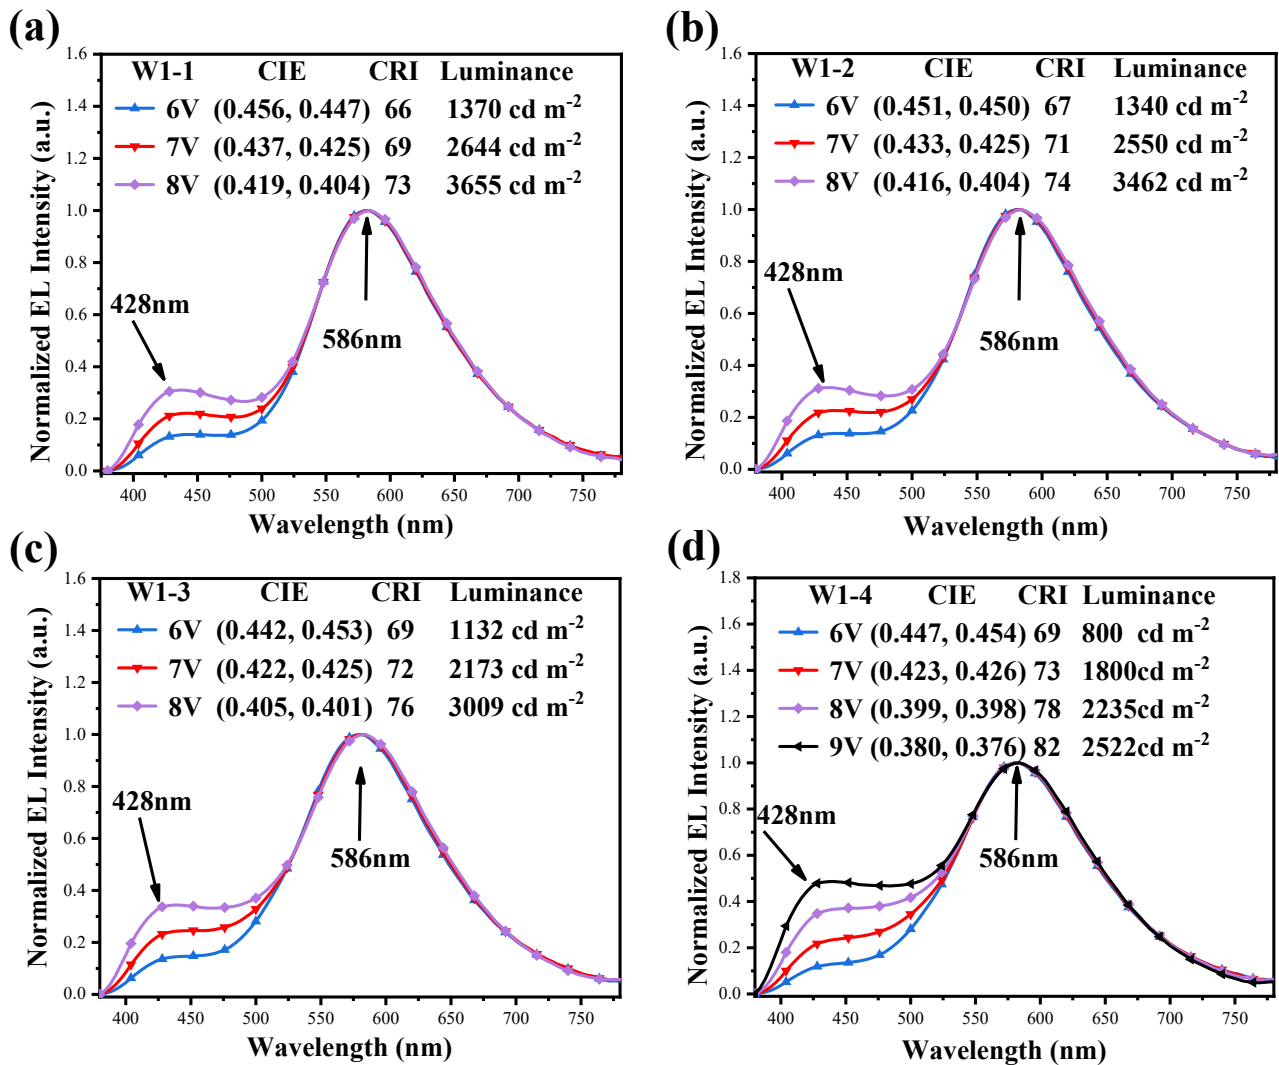

**Fig. S1** Normalized EL spectra for white devices  $W_{1-1}$  to  $W_{1-3}$  at a driving voltage range of 6-8V and for device  $W_{1-4}$  at a driving voltage range of 6- 9 V.

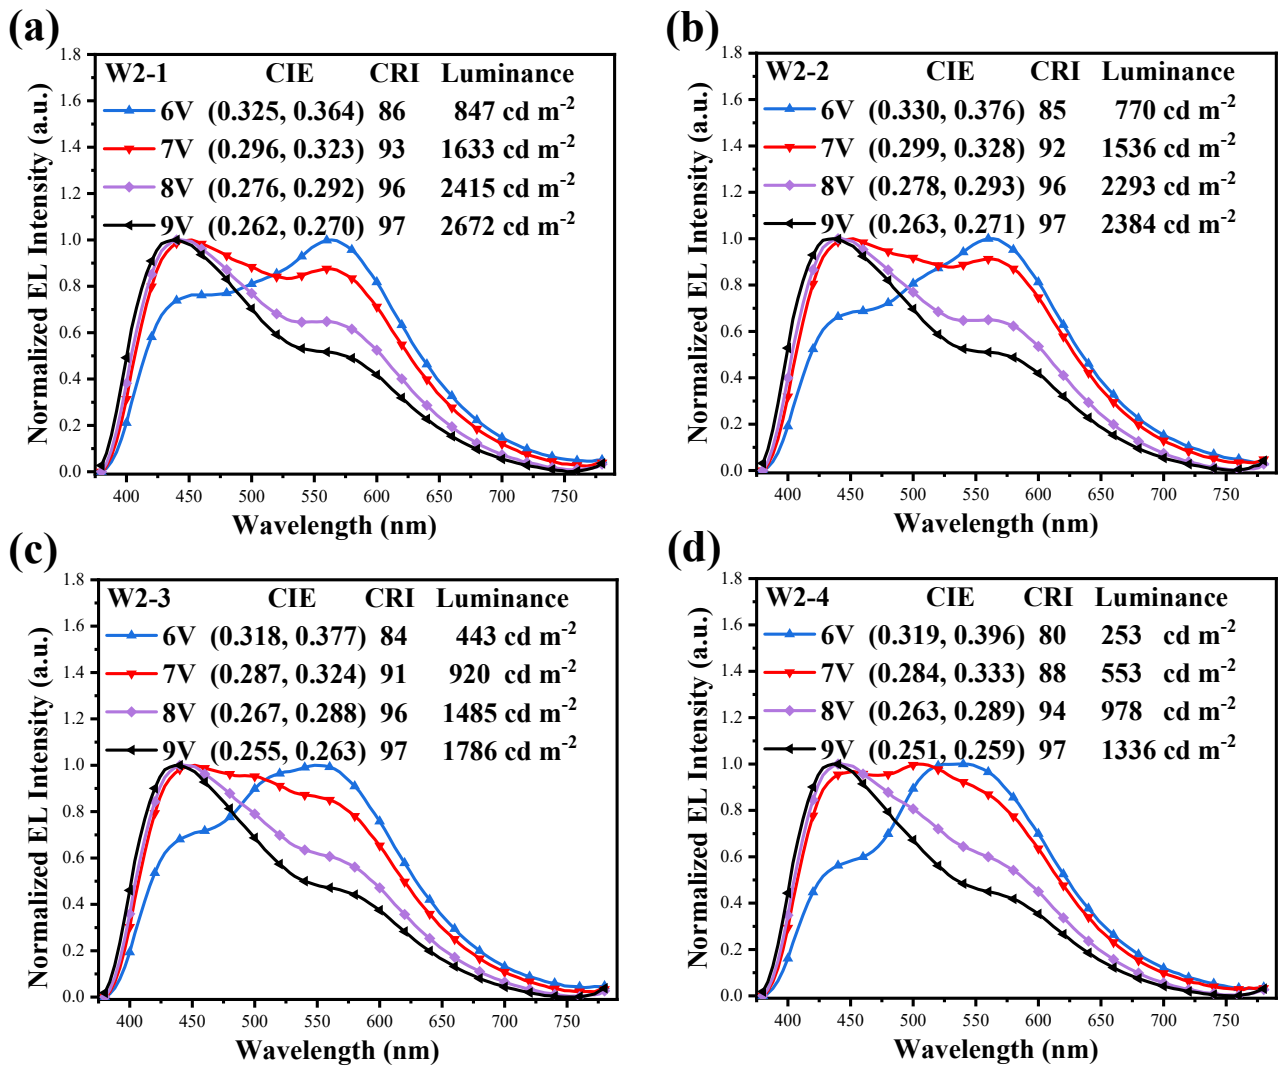

**Fig. S2** Normalized EL spectra for all white W<sub>2</sub>-series under the different driving voltage of 6, 7, 8 and 9V.
